# Supplementary material for: Epigenome-wide base-resolution profiling of DNA methylation in chorionic villi of fetuses with Down syndrome by methyl-capture sequencing
Source: Clin Epigenetics. 2019 Dec 4;11:180. doi: 10.1186/s13148-019-0756-4 (PMC6894197; doi:10.1186/s13148-019-0756-4)
Supplement: Supplementary file 1 — Additional file 1: Table S1. Clinical characteristics. Table S2. MC-seq performance of each sample. Table S3. CpG sites of each sample covered by MC-seq. Table S4. Methylation levels of DMCs in the functional genomic regions. Table S5. Methylation levels of DMCs in the fetal normal and DS brain. Table S6. Genes with DMRs. Table S7. Functional region and chromosomal location of genes with DMRs. Table S8. Primer sequences and PCR condition for methylation specific quantitative real-time PCR . [file 13148_2019_756_MOESM1_ESM.xlsx]

## Sheet: Table S1
Table S1. Clinical characteristics
Abb.	Sample ID	Kayotype results	Gestational age (weeks)	Fetal sex	Maternal age	Nuchal translucency (mm)
N1	563	46, XY	12+1	male	35	4.4
N2	1506	46, XY	12+1	male	38	1.9
N3	1531	46, XX	12+6	female	39	2.5
N4	1700	46, XY	12+1	male	37	2.8
N5	1927	46, XX	12+1	female	37	2.8
D1	86	47, XX, +21	12+4	female	35	3.9
D2	14	47, XY, +21	12+1	male	39	2.9
D3	882	47, XY, +21	12+3	male	39	4.6
D4	1077	47, XX, +21	12+1	female	41	4.9
D5	1388	47, XY, +21	13+1	male	33	9.1
P value			0.347	1	0.904	0.089
N	Normal
D	Down syndrome

## Sheet: Table S2
Table S2. MC-seq performance of each sample
Abb.	Sample ID	# of trimmed read bases (bp)	Average throughput depth of target region (X)	# of uniquely mapped reads (% out of trimmed reads)	# of suppressed non-unique mapped reads (% out of trimmed reads)	Deduplicated reads (deduplicated by Picard tools, % out of mapped reads)	Analyzed reads in BSMAP methylation calling
N1	563	31038238706	367.6	250,712,144 (80.66%)	4,168,068 (1.34%)	153,815,715 (61.35%)	153815713
N2	1506	32932749874	390.1	268,392,624 (81.41%)	4,530,778 (1.37%)	163,027,952 (60.74%)	163027950
N3	1531	29164853324	345.4	235,709,052 (80.74%)	3,994,180 (1.37%)	147,651,887 (62.64%)	147651885
N4	1700	45868386572	543.3	373,680,344 (81.35%)	6,576,280 (1.43%)	201,941,062 (54.04%)	201941060
N5	1927	37403707728	443	304,743,542 (81.37%)	5,162,332 (1.38%)	175,381,869 (57.55%)	175381867
D1	86	34508391700	408.7	281,837,290 (81.57%)	4,882,292 (1.41%)	170,557,285 (60.52%)	170557283
D2	14	37872100990	448.6	305,577,592 (80.57%)	5,144,262 (1.36%)	179,863,445 (58.86%)	179863443
D3	882	33550886896	397.4	268,737,744 (79.97%)	4,603,204 (1.37%)	163,614,627 (60.88%)	163614627
D4	1077	31329143750	371.1	256,136,772 (81.61%)	4,362,000 (1.39%)	156,840,612 (61.23%)	156840610
D5	1388	26566877464	314.7	212,109,494 (79.72%)	3,640,954 (1.37%)	136,482,622 (64.35%)	136482620
N	Normal
D	Down syndrome

## Sheet: Table S3
Table S3. CpG sites of each sample covered by MC-seq
Sample	Covered_CpG	CGI	CGI_shore	Others	Intragenic	Intergenic	Promoter	Downstream	Others
Whole Genome (hg19)	28217449	2089575	2288095	23839779	12829467	15387982	1510418	262098	13615466
MC-seq	3140060	1597050	810354	732656	1559007	1581053	820913	43216	716924
563	3088813	1554871	800235	733707	1534531	1554282	806274	42370	705638
1506	3108009	1573400	802301	732308	1544198	1563811	813008	42682	708121
1531	3100590	1568168	800947	731475	1541051	1559539	810928	42653	705958
1700	3110051	1576079	802243	731729	1545855	1564196	813947	42764	707485
1927	3106280	1572992	801709	731579	1544026	1562254	812740	42692	706822
86	3104608	1571696	801296	731616	1543168	1561440	812280	42678	706482
14	3106935	1572101	802262	732572	1543757	1563178	812367	42677	708134
882	3108966	1574327	802515	732124	1544686	1564280	813422	42700	708158
1388	3092733	1560699	799913	732121	1536845	1555888	807736	42516	705636
1077	3108721	1573959	802483	732279	1544411	1564310	813285	42743	708282
Category	Definition
Covered_CpG	CpG site
Promoter	TSS upstream 2kb
Downstream	TTS downstream 1.5kb
CGI	CpG island
CGI_shore	CGI upstream 2kb or downstream 2kb
Intragenic	UTR5 + Exonic + Intronic + UTR3
Intergenic	Not intragenic

## Sheet: Table S4
Table S4. Methylation levels of DMCs in the functional genomic regions
Chromosome	Promoter				CGI				CGI_shore
	N	DS	delta DM	p.value	N	DS	delta DM	p.value	N	DS	delta DM	p.value
chr1	0.243655	0.589648	0.345994	1.17599e-37	0.317325	0.647084	0.329759	0	0.316523	0.641959	0.325436	8.17681e-71
chr2	0.244769	0.595709	0.35094	5.12765e-92	0.281965	0.61351	0.331546	2.44284e-239	0.40431	0.662677	0.258367	7.52611e-31
chr3	0.254285	0.634126	0.379842	1.01303e-11	0.293531	0.630149	0.336618	5.08763e-100	0.237734	0.563876	0.326141	3.4547e-10
chr4	0.22596	0.553474	0.327514	2.83025e-24	0.285967	0.610077	0.324109	3.42409e-106	0.367017	0.71916	0.352143	2.53311e-26
chr5	0.29686	0.598009	0.301149	2.41334e-38	0.308572	0.639341	0.33077	1.898e-173	0.352007	0.674474	0.322467	6.7482e-46
chr6	0.246115	0.564989	0.318875	1.96863e-13	0.314681	0.654371	0.33969	2.57989e-96	0.372476	0.64823	0.275753	1.96167e-11
chr7	0.26369	0.567723	0.304032	5.65125e-35	0.30255	0.622033	0.319483	8.42797e-175	0.345221	0.679282	0.334061	2.77937e-41
chr8	0.223507	0.563364	0.339857	1.66908e-44	0.25808	0.613012	0.354933	7.1483e-293	0.300117	0.645266	0.345149	6.37016e-35
chr9	0.303825	0.58068	0.276856	1.48773e-09	0.270156	0.613237	0.343081	4.50469e-56	0.359644	0.680011	0.320367	9.47676e-28
chr10	0.251522	0.596885	0.345363	1.71854e-52	0.258416	0.609199	0.350783	1.92254e-222	0.347233	0.682648	0.335415	6.4475e-42
chr11	0.264589	0.525511	0.260922	7.38731e-17	0.280607	0.624756	0.344149	2.09665e-241	0.358638	0.66864	0.310002	9.29537e-30
chr12	0.270567	0.652934	0.382367	9.26769e-16	0.291533	0.630617	0.339084	3.68631e-97	0.372524	0.665331	0.292807	1.95898e-20
chr13	0.253575	0.58793	0.334356	2.29806e-10	0.265805	0.622135	0.356331	4.34211e-87	0.33817	0.59897	0.2608	9.68885e-09
chr14	0.260978	0.601168	0.34019	6.51443e-17	0.270766	0.616479	0.345713	4.95355e-135	0.361527	0.71437	0.352843	6.02505e-17
chr15	0.266266	0.600724	0.334457	1.85167e-18	0.252222	0.598117	0.345895	2.1071e-185	0.280474	0.618828	0.338354	9.63073e-18
chr16	0.343402	0.596767	0.253366	5.65271e-08	0.311771	0.625207	0.313436	1.68087e-101	0.346044	0.636772	0.290728	1.25134e-44
chr17	0.293761	0.592891	0.29913	1.30767e-41	0.318793	0.643018	0.324225	8.12957e-133	0.393664	0.702402	0.308737	6.41567e-32
chr18	0.370325	0.632527	0.262202	6.10459e-06	0.34022	0.681434	0.341213	2.75896e-97	0.358943	0.694613	0.33567	1.14316e-12
chr19	0.298722	0.574521	0.275799	4.20751e-37	0.32515	0.666627	0.341477	0	0.315649	0.671843	0.356195	2.50414e-30
chr20	0.201435	0.538465	0.33703	8.99104e-21	0.253491	0.590102	0.336612	4.13105e-136	0.309747	0.656679	0.346933	2.2299e-18
chr21	0.282107	0.622831	0.340724	2.98092e-17	0.479444	0.798899	0.319455	3.89612e-58	0.525784	0.832728	0.306945	0.00344899
chr22	0.293236	0.614409	0.321174	1.60888e-34	0.311636	0.652874	0.341238	6.46904e-135	0.336222	0.614893	0.278671	3.70439e-09
Total	0.267461	0.585687	0.318226	0	0.297189	0.634523	0.337335	0	0.348154	0.662223	0.314069	0
delta DM	difference in mean of DMCs methylation levels between normal and down syndrome (DS)
N	Normal
DS	Down syndrome

## Sheet: Table S5
Table S5. Methylation levels of DMCs in the fetal normal and DS brain
ID_REF	Methylation pattern in the DS	N (n=36)	DS (n=25)	delta DM	p value	FDR	chr	UCSC_RefGene_Name	UCSC_RefGene_Accession	UCSC_RefGene_Group	UCSC_CpG_Islands_Name	Relation_to_UCSC_CpG_Island
cg00270625	hyper	0.334808	0.677158	0.342349	1.42988e-18	2.14789e-06	22	CPT1B;CPT1B;CPT1B;CPT1B;CHKBCPT1B;CPT1B;CPT1B;CPT1B;CPT1B;CPT1B;CPT1B;CPT1B	NM_152245;NM_001145137;NM_001145136;NM_001145135;NR_027928;NM_001145134;NM_152245;NM_004377;NM_152246;NM_001145135;NM_001145136;NM_001145134	1stExon;TSS1500;1stExon;5'UTR;Body;1stExon;5'UTR;TSS200;TSS200;1stExon;5'UTR;5'UTR	chr22:51016253-51017020	Island
cg01463139	hyper	0.35457	0.654611	0.300041	0.000559474	0.000792894	1	OR10K1	NM_001004473	TSS200
cg05156901	hyper	0.149731	0.47379	0.324059	1.04999e-22	3.22184e-07	22	CPT1B;CPT1B;CPT1B;CHKBCPT1B;CPT1B;CPT1B;CPT1B;CPT1B	NM_152246;NM_001145135;NM_001145137;NR_027928;NM_152245;NM_001145136;NM_004377;NM_001145134	5'UTR;5'UTR;TSS200;Body;5'UTR;5'UTR;5'UTR;5'UTR	chr22:51016253-51017020	Island
cg08260245	hyper	0.24188	0.553833	0.311953	1.27163e-20	1.07395e-06	22	CPT1B;CPT1B;CHKBCPT1B;CPT1B;CPT1B;CPT1B;CPT1B;CPT1B;CPT1B	NM_152246;NM_001145135;NR_027928;NM_152245;NM_001145137;NM_001145136;NM_001145137;NM_004377;NM_001145134	5'UTR;5'UTR;Body;5'UTR;5'UTR;5'UTR;1stExon;5'UTR;5'UTR	chr22:51016253-51017020	Island
cg10365886	hyper	0.268411	0.596366	0.327955	1.88648e-12	1.56796e-05	6	TNXB	NM_019105	Body	chr6:32063533-32065044	Island
cg13655169	hyper	0.231076	0.593974	0.362898	1.09842e-06	0.000188585	14
cg19112186	hyper	0.129562	0.456169	0.326608	5.21108e-23	2.14789e-07	22	CPT1B;CPT1B;CPT1B;CHKBCPT1B;CPT1B;CPT1B;CPT1B;CPT1B	NM_152246;NM_001145135;NM_001145137;NR_027928;NM_152245;NM_001145136;NM_004377;NM_001145134	5'UTR;5'UTR;TSS200;Body;5'UTR;5'UTR;5'UTR;5'UTR	chr22:51016253-51017020	Island
cg25013753	hyper	0.307464	0.637712	0.330248	0.000166933	0.000588737	10	ARHGAP22	NM_021226	3'UTR	chr10:49658224-49659201	N_Shelf
cg05593887	hypo	0.654891	0.293622	-0.36127	5.95937e-05	0.000456964	7	MAGI2	NM_012301	Body
delta DM	difference in mean of DMCs methylation levels between normal and down syndrome (DS)
N	Normal
DS	Down syndrome

## Sheet: Table S6
Table S6. Genes with DMRs
	Gene	No. of DMCs	DMRs
			No.	No. of	No. of DMCs	%
				total CpGs
Hyper	ZNF837	79	6	180	79	43.9
	C11orf95	73	8	158	71	44.9
	KIAA1875	50	4	164	47	28.7
	CASZ1	46	5	68	41	60.3
	SHROOM1	41	4	28	19	67.9
	LRRK1	37	6	103	34	33
	GDF1	34	3	108	34	31.5
	KIF26B	33	3	80	23	28.8
	TLX1	30	1	12	11	91.7
	LINC00574_LOC154449	28	2	3451	28	0.8
	TPGS1	28	3	75	26	34.7
	SPATC1L	28	2	70	23	32.9
	THBD	26	3	45	23	51.1
	GPT	23	2	24	10	41.7
	ECEL1P2_ALPPL2	20	2	24	18	75
	TRANK1_EPM2AIP1	20	2	20	20	100
	C8orf46_MYBL1	19	3	41	19	46.3
	STMN3	19	1	30	14	46.7
	MXRA8	18	1	124	18	14.5
	ZNF497	18	1	139	17	12.2
	VIPR2	17	2	1789	16	0.9
	NAPRT	16	1	77	9	11.7
	EFEMP2	16	1	12	12	100
	YJEFN3	16	1	255	15	5.9
	OXCT1	15	1	20	15	75
	MAPK8IP2	15	1	47	13	27.7
	SIX6_SIX1	14	1	14	13	92.9
	LINC00605_EIF5	14	2	29	14	48.3
	SOX9	14	1	19	12	63.2
	CACNA1H	13	1	191	4	2.1
	C2CD4C	13	2	65	12	18.5
	B4GALNT4	12	1	58	7	12.1
	LINC01029_SALL3	12	1	11483	12	0.1
	MYO15A	11	1	166	9	5.4
	AXIN2	11	1	10	7	70
	SALL3_ATP9B	11	1	61	8	13.1
	RAET1L	10	1	3	4	133.3
	UNCX_MICALL2	10	1	2147	10	0.5
	DUOX2	10	1	3	3	100
	ECE1_NBPF3	9	1	99	9	9.1
	RAB28_LINC01097	9	1	140	9	6.4
	RGS22	9	2	13	8	61.5
	BRSK2	9	1	909	4	0.4
	C1QL4	9	1	7	7	100
	KIF7	9	1	23	8	34.8
	CERS1,GDF1	9	1	14	9	64.3
	SUMO3	9	1	26	8	30.8
	CPT1B	9	1	15	5	33.3
	ARHGEF19_RSG1	8	1	19	8	42.1
	CRMP1	8	1	120	7	5.8
	MNX1	8	1	16	7	43.8
	TLX1NB	8	1	34	8	23.5
	TSPAN4	8	1	509	8	1.6
	LOC283683_WHAMMP3	8	1	8	8	100
	LINC01237	7	1	1125	7	0.6
	SEPP1_FLJ32255	7	1	10	7	70
	LOC101928401_LOC100130849	7	1	6	6	100
	DPP6	7	1	8696	7	0.1
	TACC2	7	1	7	6	85.7
	SLC15A3	7	1	10	7	70
	SLC8A3_ADAM21P1	7	1	11	6	54.5
	AHSP_YBX3P1	7	1	54	7	13
	NAGS	7	1	3	3	100
	SHANK1	7	1	110	5	4.5
	WNT3A	6	1	72	6	8.3
	MIR4277_MRPL36	6	1	9	6	66.7
	ZNF354A	6	1	16	6	37.5
	RNASE4_EDDM3A	6	1	16	6	37.5
	CBFA2T3_ACSF3	6	1	84	4	4.8
	LOC100287072_CCDC144NL	6	1	35	6	17.1
	GRIN3B	6	1	126	6	4.8
	HSD11B1L	6	1	9	6	66.7
	NFIX	6	1	272	6	2.2
	ANKRD20A11P_LIPI	6	1	6	6	100
	LEFTY1	5	1	7	5	71.4
	MED15P9	5	1	7	5	71.4
	MGLL_KBTBD12	5	1	19	5	26.3
	RAB9BP1_LOC102467213	5	1	11	5	45.5
	HLA-DOA	5	1	3	3	100
	MMP21	5	1	7	5	71.4
	BEST1	5	1	3	3	100
	KCNA1_KCNA5	5	1	6	5	83.3
	RTN1	5	1	25	5	20
	LOC145845	5	1	3	3	100
	SNAR-F	5	1	27	5	18.5
	FAM217B	5	1	72	5	6.9
	DPYS	4	1	4	4	100
	TECTA	4	1	21	4	19
	FOXL1_LOC101928708	4	1	3	3	100
	BTBD17	4	1	5	4	80
	TBX1	4	1	6	4	66.7
	ODF3B_KLHDC7B	4	1	4	4	100
	FOXD2	3	1	3	3	100
	C14orf180	3	1	3	3	100
Hypo	PURA	3	1	10	3	30
DMRs: differentially methylated regions, Hyper: hypermethylated DMRs in DS, Hypo: hypomethylated DMRs in DS

## Sheet: Table S7
Table S7. Functional region and chromosomal location of genes with DMRs
Methylation pattern in the DS	Gene	No. of DMR	Functional region	Chromosomal location
Hyper	MXRA8	1	exonic	chr1	1290238	1291092
	CASZ1	5	exonic	chr1	10699452	10700098
	ARHGEF19_RSG1	1	intergenic	chr1	16554379	16554512
	ECE1_NBPF3	1	intergenic	chr1	21754986	21755968
	FOXD2	1	exonic	chr1	47904946	47904970
	LEFTY1	1	exonic	chr1	226075286	226075329
	WNT3A	1	intronic	chr1	228225606	228228108
	KIF26B	3	exonic	chr1	245851316	245852027
	MED15P9	1	ncRNA_exonic	chr2	130887287	130887343
	ECEL1P2_ALPPL2	2	intergenic	chr2	233252972	233253196
	LINC01237	1	ncRNA_intronic	chr2	242889258	242939149
	TRANK1_EPM2AIP1	2	intergenic	chr3	37017727	37017892
	MGLL_KBTBD12	1	intergenic	chr3	127634345	127634528
	CRMP1	1	intronic	chr4	5889852	5892090
	RAB28_LINC01097	1	intergenic	chr4	13524306	13526726
	MIR4277_MRPL36	1	intergenic	chr5	1769947	1770051
	OXCT1	1	intronic	chr5	41869585	41869864
	SEPP1_FLJ32255	1	intergenic	chr5	42950062	42950155
	RAB9BP1_LOC102467213	1	intergenic	chr5	105753017	105753129
	SHROOM1	2	exonic	chr5	132158543	132158787
		1	intronic	chr5	132158828	132158918
		1	exonic	chr5	132158956	132159124
	ZNF354A	1	intronic	chr5	178156267	178156432
	HLA-DOA	1	exonic	chr6	32975850	32975860
	RAET1L	1	exonic	chr6	150346523	150346538
	LINC00574_LOC154449	2	intergenic	chr6	170338437	170477972
	UNCX_MICALL2	1	intergenic	chr7	1300225	1370839
	LOC101928401_LOC100130849	1	intergenic	chr7	56855127	56855171
	DPP6	1	intronic	chr7	153748431	154585956
	MNX1	1	downstream	chr7	156796750	156796869
	VIPR2	1	intronic	chr7	158854632	158937348
		1	upstream	chr7	158937939	158938077
	C8orf46_MYBL1	3	intergenic	chr8	67454448	67455019
	RGS22	2	UTR5	chr8	101118165	101118236
	DPYS	1	exonic	chr8	105478974	105478990
	NAPRT	1	exonic	chr8	144659904	144660468
	KIAA1875	1	ncRNA_exonic	chr8	145162974	145162984
		1	ncRNA_intronic	chr8	145163170	145163201
		2	ncRNA_exonic	chr8	145163237	145164918
	GPT	1	exonic	chr8	145730668	145730841
	GPT	1	exonic	chr8	145731256	145731308
	TLX1NB	1	intronic	chr10	102881082	102881546
	TLX1	1	exonic	chr10	102893974	102894060
	TACC2	1	UTR5	chr10	123923347	123923385
	MMP21	1	exonic	chr10	127462800	127462834
	B4GALNT4	1	exonic	chr11	379419	379931
	TSPAN4	1	intronic	chr11	850510	865622
	BRSK2	1	intronic	chr11	1429883	1457251
	SLC15A3	1	exonic	chr11	60718660	60718726
	BEST1	1	exonic	chr11	61723377	61723402
	C11orf95	4	UTR3	chr11	63529951	63530889
		3	exonic	chr11	63530893	63531340
		1	intronic	chr11	63531361	63531400
	EFEMP2	1	exonic	chr11	65635391	65635526
	TECTA	1	exonic	chr11	121028592	121028742
	KCNA1_KCNA5	1	intergenic	chr12	5127222	5127286
	C1QL4	1	intronic	chr12	49727065	49727103
	RNASE4_EDDM3A	1	intergenic	chr14	21191687	21191822
	RTN1	1	exonic	chr14	60193747	60194010
	SIX6_SIX1	1	intergenic	chr14	60982354	60982424
	SLC8A3_ADAM21P1	1	intergenic	chr14	70700922	70700975
	LINC00605_EIF5	2	intergenic	chr14	103745680	103745844
	C14orf180	1	exonic	chr14	105054940	105054980
	LOC283683_WHAMMP3	1	intergenic	chr15	23158568	23158622
	LOC145845	1	upstream	chr15	37178790	37178839
	DUOX2	1	intronic	chr15	45403290	45403298
	KIF7	1	exonic	chr15	90191818	90191984
	LRRK1	3	intronic	chr15	101513324	101514003
		3	exonic	chr15	101514013	101514155
	CACNA1H	1	exonic	chr16	1252151	1256243
	AHSP_YBX3P1	1	intergenic	chr16	31548624	31549142
	FOXL1_LOC101928708	1	intergenic	chr16	87211356	87211387
	CBFA2T3_ACSF3	1	intergenic	chr16	89114943	89117327
	MYO15A	1	exonic	chr17	18022196	18023986
	LOC100287072_CCDC144NL	1	intergenic	chr17	20687603	20687882
	NAGS	1	exonic	chr17	42082390	42082406
	AXIN2	1	exonic	chr17	63533778	63533914
	SOX9	1	UTR5	chr17	70117381	70117486
	BTBD17	1	exonic	chr17	72353773	72353798
	LINC01029_SALL3	1	intergenic	chr18	76069487	76685397
	SALL3_ATP9B	1	intergenic	chr18	76766132	76766742
	C2CD4C	1	UTR3	chr19	407049	407093
		1	exonic	chr19	407445	408159
	TPGS1	3	exonic	chr19	518892	519402
	GRIN3B	1	exonic	chr19	1007637	1009246
	HSD11B1L	1	exonic	chr19	5687821	5687846
	NFIX	1	intronic	chr19	13113529	13122298
	GDF1	3	exonic	chr19	18979503	18980196
	CERS1,GDF1	1	intronic	chr19	18980223	18980386
	YJEFN3	1	exonic	chr19	19639770	19648324
	SNAR-F	1	upstream	chr19	51107579	51107853
	SHANK1	1	exonic	chr19	51165687	51170250
	ZNF497	1	exonic	chr19	58867511	58868720
	ZNF837	1	UTR3	chr19	58879056	58879092
		5	exonic	chr19	58879110	58880585
	THBD	3	exonic	chr20	23028429	23028897
	FAM217B	1	upstream	chr20	58507845	58508522
	STMN3	1	UTR3	chr20	62272340	62272680
	ANKRD20A11P_LIPI	1	intergenic	chr21	15436314	15436350
	SUMO3	1	upstream	chr21	46238670	46238889
	SPATC1L	1	exonic	chr21	47581364	47581599
		1	intronic	chr21	47581668	47582050
	TBX1	1	intronic	chr22	19746319	19746369
	ODF3B_KLHDC7B	1	intergenic	chr22	50985262	50985288
	CPT1B	1	ncRNA_UTR5	chr22	51016819	51017004
	MAPK8IP2	1	exonic	chr22	51042567	51042898
Hypo	PURA	1	exonic	chr5	139494331	139494341
DS	Down syndrome

## Sheet: Table S8
Table S8. Primer sequences and PCR condition for methylation specific quantitative real-time PCR
Target gene	Primer	Sequence	nt	Amplicon(bp)
CASZ1	F	TCGTCCAGCACCAGGTTGTC	20	150
	R	GGACTGCAAGGACGCAGCTT	20
KIAA1875	F	ACGGCTCGGTCTACCTCCTG	20	237
	R	TGTACAGGTGCAGACAGCAAGG	22
C11orf95	F	CGACACACAGCGCCAGACTT	20	185
	R	ACCATCAAGCGCCACATCCT	20
ZNF837	F	CAGGAGTTCCTGCTGCAGTCC	21	101
	R	TCTTCTCAGAACCCTGAGCTGGTT	24
SHROOM1	F	AGGAAGAGGCGCCGTGAG	18	108
	R	AAAGGGGTTCAGGTTGCAAG	20
CPT1B	F	CCACGTCCTTCAGGCCTAGC	20	115
	R	GGAAGGTGGGTGGGTTCTGG	20
Target gene		Step	Tm (°C)	Time	Cycles	Component	Amount/rxn
CASZ1, KIAA1875, C11orf95, ZNF837, CPT1B		Pre-denaturation	95	2 min	-	RR420*	10µl	* RR420: TAKARA, TB Green™ Premix Ex Taq™
		Denaturation	95	5 sec	40	F & R primer	10pmole each#	** B0300: Sigma-Aldrich, Betaine solution (5M, PCR Reagent)
		Annealing/Extension	65	1 min		B0300**	8µl	# CPT1B: 20pmole each
		Melting*	75-95		-	Template	~10ng
		* Increment 0.2°C, for 10 sec				Total	20µl
Target gene		Step	Tm (°C)	Time	Cycles	Component	Amount/rxn
SHROOM1		Pre-denaturation	95	3 min	-	Ez_kapa sybr*	10µl	*KAPA Biosystem, Wilmington, MA, USA
		Denaturation	95	15 sec	37	F & R primer	10pmole each
		Annealing	68	10 sec		Template	~10ng
		Extension	72	10 sec
		Melting*	68-95		-	Total	20µl
		* Increment 0.3°C, for 30 sec
